# Supplementary material for: Co-activation of super-enhancer-driven CCAT1 by TP63 and SOX2 promotes squamous cancer progression
Source: PubMed Central journal article supplement (PMC6127298; doi:10.1038/s41467-018-06081-9), 2018-09-06
Supplement: 41467_2018_6081_MOESM2_ESM.pdf [file 41467_2018_6081_MOESM2_ESM.pdf]

## **Description of Additional Supplementary Files**

File Name: Supplementary Data 1

Description: Super-Enhancer Analysis of KYSE70 Cells

File Name: Supplementary Data 2

Description: Super-Enhancer Analysis of KYSE140 Cells

File Name: Supplementary Data 3

Description: Super-Enhancer Analysis of TE5 Cells

File Name: Supplementary Data 4

Description: Super-Enhancer Analysis of TT Cells

File Name: Supplementary Data 5

Description: Expression Values per Transcript in Gene Expression Analysis of silencing TP63 in TE5 Cells

File Name: Supplementary Data 6

Description: Expression Values per Transcript in Gene Expression Analysis of silencing SOX2 in TE5 Cells

File Name: Supplementary Data 7

Description: Expression Values per Transcript in Gene Expression Analysis of silencing TP63 in KYSE140 Cells

File Name: Supplementary Data 8

Description: Expression Values per Transcript in Gene Expression Analysis of silencing SOX2 in KYSE140 Cells

File Name: Supplementary Data 9

Description: Expression Values per Transcript in Gene Expression Analysis of silencing CCAT1 in TE5 Cells
